# Supplementary material for: Bioactivity Potential of Marine Natural Products from Scleractinia-Associated Microbes and In Silico Anti-SARS-COV-2 Evaluation
Source: PubMed Central journal article supplement (PMC7765564; doi:10.3390/md18120645), 2020-12-16
Supplement: marinedrugs-18-00645-s001.pdf [file marinedrugs-18-00645-s001.pdf]

# Bioactivity Potential of Marine Natural Products from Scleractinia-Associated Microbes and *In Silico* Anti-SARS-COV-2 Evaluation

Eman Maher Zahran <sup>1,#</sup>, Amgad Albohy <sup>2,#</sup>, Amira Khalil <sup>2</sup>, Alyaa Hatem Ibrahim <sup>3</sup>, Heba Ali Ahmed <sup>1</sup>, Ebaa M. El-Hossary <sup>4</sup>, Gerhard Bringmann <sup>5,\*</sup> and Usama Ramadan Abdelmohsen <sup>1,6,\*</sup>

<sup>1</sup> Department of Pharmacognosy, Faculty of Pharmacy, Deraya University, Universities Zone, 61111 New Minia City, Egypt

<sup>2</sup> Department of Pharmaceutical Chemistry, Faculty of Pharmacy, The British University in Egypt (BUE), El-Sherouk City, Cairo-Suez Desert Road, 11837, Egypt

<sup>3</sup> Department of Pharmacognosy, Faculty of Pharmacy, Sohag University, 82524 Sohag, Egypt

<sup>4</sup> National Centre for Radiation Research & Technology, Egyptian Atomic Energy Authority, Ahmed El-Zomor St. 3, El-Zohoor Dist., Nasr City, 11765 Cairo, Egypt

<sup>5</sup> Institute of Organic Chemistry, University of Würzburg, Am Hubland, 97074 Würzburg, Germany

<sup>6</sup> Department of Pharmacognosy, Faculty of Pharmacy, Minia University, 61519 Minia, Egypt

\* Correspondence: Gerhard Bringmann ([bringman@chemie.uni-wuerzburg.de](mailto:bringman@chemie.uni-wuerzburg.de)) and Usama Ramadan Abdelmohsen ([usama.ramadan@mu.edu.eg](mailto:usama.ramadan@mu.edu.eg))

# These authors have equally contributed to this work

**Table S1:** Marine natural products isolated from Scleractinia-associated organisms

| No. | Name                                                 | Chemical category | Source organism           | Host                  | Biological activity | Geographical location  | Reference |
|-----|------------------------------------------------------|-------------------|---------------------------|-----------------------|---------------------|------------------------|-----------|
| 1   | 12-Dimethoxy-pinselin                                | Xanthone          | <i>Scopulariopsis</i> sp. | <i>Stylophora</i> sp. | Not mentioned       | Red sea, Egypt, Africa | [1]       |
| 2   | 12-O-acetyl-AGI-B4                                   | Xanthone          | <i>Scopulariopsis</i> sp. | <i>Stylophora</i> sp. | Not mentioned       | Red sea, Egypt, Africa | [1]       |
| 3   | AGI-B4                                               | Xanthone          | <i>Scopulariopsis</i> sp. | <i>Stylophora</i> sp. | Cytotoxic           | Red sea, Egypt, Africa | [1]       |
| 4   | Hyperxanthone C                                      | Xanthone          | <i>Scopulariopsis</i> sp. | <i>Stylophora</i> sp. | Not mentioned       | Red sea, Egypt, Africa | [1]       |
| 5   | Pinselin                                             | Xanthone          | <i>Scopulariopsis</i> sp. | <i>Stylophora</i> sp. | Immuno-suppressive  | Red sea, Egypt, Africa | [1,2]     |
| 6   | Sydowinin B                                          | Xanthone          | <i>Scopulariopsis</i> sp. | <i>Stylophora</i> sp. | Immuno-suppressive  | Red sea, Egypt, Africa | [1,3]     |
| 7   | 13-O-acetyl-sydowinin B                              | Xanthone          | <i>Scopulariopsis</i> sp. | <i>Stylophora</i> sp. | Antioxidant         | Red sea, Egypt, Africa | [1,4]     |
| 8   | 2,11-Dihydroxy-1-methoxycarbonyl-9-carboxyl-xanthone | Xanthone          | <i>Scopulariopsis</i> sp. | <i>Stylophora</i> sp. | Not mentioned       | Red sea, Egypt, Africa | [1]       |
| 9   | Sydowinin A                                          | Xanthone          | <i>Scopulariopsis</i> sp. | <i>Stylophora</i> sp. | Immuno-suppressive  | Red sea, Egypt, Africa | [1,3]     |

|    |                                                                    |                         |                           |                       |                           |                        |       |
|----|--------------------------------------------------------------------|-------------------------|---------------------------|-----------------------|---------------------------|------------------------|-------|
| 10 | 8-(Methoxy-carbonyl)-1-hydroxy-9-oxo-9H-xanthene-3-carboxylic acid | Xanthone                | <i>Scopulariopsis</i> sp. | <i>Stylophora</i> sp. | Not mentioned             | Red sea, Egypt, Africa | [1]   |
| 11 | Methyl-3,8-dihydroxy-6-methyl-9-oxo-9H-xanthene-1-carboxylate      | Xanthone                | <i>Scopulariopsis</i> sp. | <i>Stylophora</i> sp. | Cytotoxic                 | Red sea, Egypt, Africa | [1,5] |
| 12 | Sydowic acid                                                       | Sesquiterpene           | <i>Scopulariopsis</i> sp. | <i>Stylophora</i> sp. | Anti-phyto-pathogenic     | Red sea, Egypt, Africa | [1,6] |
| 13 | Sydonic acid                                                       | Sesquiterpene           | <i>Scopulariopsis</i> sp. | <i>Stylophora</i> sp. | Anti-phyto-pathogenic     | Red sea, Egypt, Africa | [1,6] |
| 14 | 11-Hydroxysydonic acid                                             | Sesquiterpene           | <i>Scopulariopsis</i> sp. | <i>Stylophora</i> sp. | Not mentioned             | Red sea, Egypt, Africa | [1]   |
| 15 | 11,12-Dihydroxysydonic acid                                        | Sesquiterpene           | <i>Scopulariopsis</i> sp. | <i>Stylophora</i> sp. | Not mentioned             | Red sea, Egypt, Africa | [1]   |
| 16 | 1-Hydroxy-boivinianic acid                                         | Sesquiterpene           | <i>Scopulariopsis</i> sp. | <i>Stylophora</i> sp. | Not mentioned             | Red sea, Egypt, Africa | [1]   |
| 17 | Violaceol I                                                        | Phenyl ether derivative | <i>Scopulariopsis</i> sp. | <i>Stylophora</i> sp. | Cytotoxic and antioxidant | Red sea, Egypt, Africa | [1,4] |
| 18 | Violaceol II                                                       | Phenyl ether derivative | <i>Scopulariopsis</i> sp. | <i>Stylophora</i> sp. | Cytotoxic and antioxidant | Red sea, Egypt, Africa | [1,4] |
| 19 | Diorcinol                                                          | Phenyl ether derivative | <i>Scopulariopsis</i> sp. | <i>Stylophora</i> sp. | Antioxidant               | Red sea, Egypt, Africa | [1,4] |

|    |                            |                             |                                    |                             |                            |                        |       |
|----|----------------------------|-----------------------------|------------------------------------|-----------------------------|----------------------------|------------------------|-------|
| 20 | Rikuzenol                  | Phenyl ether derivative     | <i>Scopulariopsis</i> sp.          | <i>Stylophora</i> sp.       | Not mentioned              | Red sea, Egypt, Africa | [1]   |
| 21 | Scopulamide                | Alkaloid                    | <i>Scopulariopsis</i> sp.          | <i>Stylophora</i> sp.       | Not mentioned              | Red sea, Egypt, Africa | [1]   |
| 22 | Lumichrome                 | Alkaloid                    | <i>Scopulariopsis</i> sp.          | <i>Stylophora</i> sp.       | Not mentioned              | Red sea, Egypt, Africa | [1]   |
| 23 | WIN 64821                  | Alkaloid                    | <i>Scopulariopsis</i> sp.          | <i>Stylophora</i> sp.       | Not mentioned              | Red sea, Egypt, Africa | [1]   |
| 24 | Scopularide A              | Cyclodepsi-peptide          | <i>Scopulariopsis</i> sp.          | <i>Stylophora</i> sp.       | Cytotoxic                  | Red sea, Egypt, Africa | [1]   |
| 25 | Scopularide B              | Cyclodepsi-peptide          | <i>Scopulariopsis</i> Sp.          | <i>Stylophora</i> Sp.       | Anticancer                 | Red sea, Egypt, Africa | [1,7] |
| 26 | Scopupyrone                | $\alpha$ -Pyrone derivative | <i>Scopulariopsis</i> sp.          | <i>Stylophora</i> sp.       | Not mentioned              | Red sea, Egypt, Africa | [1]   |
| 27 | Pyrenochaetic acid         | Benzoic acid derivative     | <i>Scopulariopsis</i> sp.          | <i>Stylophora</i> sp.       | Cytotoxic                  | Red sea, Egypt, Africa | [1,8] |
| 28 | 7-OH-2,5-Dimethyl-chromone | Chromone derivative         | <i>Scopulariopsis</i> sp.          | <i>Stylophora</i> sp.       | Not mentioned              | Red sea, Egypt, Africa | [1]   |
| 29 | Ergosterol                 | Sterol                      | <i>Scopulariopsis</i> sp.          | <i>Stylophora</i> sp.       | Not mentioned              | Red sea, Egypt, Africa | [1]   |
| 30 | 4-Methyl-candidusin A      | Candidusin derivative       | <i>Aspergillus tritici</i> SP2-8-1 | <i>Galaxea fascicularis</i> | Cytotoxic<br>Antibacterial | Malaysia, Asia         | [9]   |
| 31 | Aspetritone A              | Anthraquinone derivative    | <i>Aspergillus tritici</i> SP2-8-1 | <i>Galaxea fascicularis</i> | Cytotoxic<br>Antibacterial | Malaysia, Asia         | [9]   |

|    |                                     |                             |                                       |                             |                                |                |     |
|----|-------------------------------------|-----------------------------|---------------------------------------|-----------------------------|--------------------------------|----------------|-----|
| 32 | Aspetritone B                       | Anthraquinone derivative    | <i>Aspergillus tritici</i><br>SP2-8-1 | <i>Galaxea fascicularis</i> | Cytotoxic<br>Antibacterial     | Malaysia, Asia | [9] |
| 33 | 3,4-Dimethyl-3''-prenylcandidusin A | Prenylcandidusin derivative | <i>Aspergillus tritici</i><br>SP2-8-1 | <i>Galaxea fascicularis</i> | Cytotoxic<br>Antibacterial     | Malaysia, Asia | [9] |
| 34 | 4-Methyl-3''-prenylcandidusin A     | Prenylcandidusin derivative | <i>Aspergillus tritici</i><br>SP2-8-1 | <i>Galaxea fascicularis</i> | Cytotoxic<br>Antibacterial     | Malaysia, Asia | [9] |
| 35 | 3,4-Dimethylcandidusin A            | Candidusin derivative       | <i>Aspergillus tritici</i><br>SP2-8-1 | <i>Galaxea fascicularis</i> | Not mentioned                  | Malaysia, Asia | [9] |
| 36 | Candidusin A                        | Candidusin derivative       | <i>Aspergillus tritici</i><br>SP2-8-1 | <i>Galaxea fascicularis</i> | Cytotoxic and<br>antibacterial | Malaysia, Asia | [9] |
| 37 | 4,4'-Deoxyterphenyllin              | Terphenyllin derivative     | <i>Aspergillus tritici</i><br>SP2-8-1 | <i>Galaxea fascicularis</i> | Not mentioned                  | Malaysia, Asia | [9] |
| 38 | 4''-Deoxyterphenyllin               | Terphenyllin derivative     | <i>Aspergillus tritici</i><br>SP2-8-1 | <i>Galaxea fascicularis</i> | Cytotoxic<br>Antibacterial     | Malaysia, Asia | [9] |
| 39 | 3-Prenylterphenyllin                | Terphenyllin derivative     | <i>Aspergillus tritici</i><br>SP2-8-1 | <i>Galaxea fascicularis</i> | Cytotoxic<br>Antibacterial     | Malaysia, Asia | [9] |
| 40 | Terphenyllin                        | Terphenyllin derivative     | <i>Aspergillus tritici</i><br>SP2-8-1 | <i>Galaxea fascicularis</i> | Cytotoxic<br>Antibacterial     | Malaysia, Asia | [9] |
| 41 | 3-Hydroxyterphenyllin               | Terphenyllin derivative     | <i>Aspergillus tritici</i><br>SP2-8-1 | <i>Galaxea fascicularis</i> | Cytotoxic<br>Antibacterial     | Malaysia, Asia | [9] |

|    |                                                                            |                          |                                       |                             |                            |                        |      |
|----|----------------------------------------------------------------------------|--------------------------|---------------------------------------|-----------------------------|----------------------------|------------------------|------|
| 42 | 3-Hydroxy-3"-deoxyterphenyllin                                             | Terphenyllin derivative  | <i>Aspergillus tritici</i><br>SP2-8-1 | <i>Galaxea fascicularis</i> | Not mentioned              | Malaysia, Asia         | [9]  |
| 43 | 3"-Prenylterphenyllin                                                      | Terphenyllin derivative  | <i>Aspergillus tritici</i><br>SP2-8-1 | <i>Galaxea fascicularis</i> | Cytotoxic<br>Antibacterial | Malaysia, Asia         | [9]  |
| 44 | Emodin                                                                     | Anthraquinone derivative | <i>Aspergillus tritici</i><br>SP2-8-1 | <i>Galaxea fascicularis</i> | Cytotoxic<br>Antibacterial | Malaysia, Asia         | [9]  |
| 45 | 3-Hydroxy-1,2,5,6-tetramethoxyanthracene-9,10-dione                        | Anthraquinone derivative | <i>Aspergillus tritici</i><br>SP2-8-1 | <i>Galaxea fascicularis</i> | Cytotoxic<br>Antibacterial | Malaysia, Asia         | [9]  |
| 46 | 3-Hydroxy-2-hydroxymethyl-1-methoxyanthracene-9,10-dione                   | Anthraquinone derivative | <i>Aspergillus tritici</i><br>SP2-8-1 | <i>Galaxea fascicularis</i> | Not mentioned              | Malaysia, Asia         | [9]  |
| 47 | 1,2,3-Trimethoxy-7-hydroxymethylanthracene-9,10-dione                      | Anthraquinone derivative | <i>Aspergillus tritici</i><br>SP2-8-1 | <i>Galaxea fascicularis</i> | Not mentioned              | Malaysia, Asia         | [9]  |
| 48 | 3 $\beta$ ,7 $\beta$ ,15 $\alpha$ ,24-Tetrahydroxyolean-12-ene-11,22-dione | Triterpene               | <i>Scopulariopsis</i> sp.             | <i>Stylophora</i> sp.       | Not mentioned              | Red Sea, Egypt, Africa | [10] |
| 49 | 15 $\alpha$ ,22 $\beta$ ,24-Trihydroxyolean-11,13-diene-3-one              | Triterpene               | <i>Scopulariopsis</i> sp.             | <i>Stylophora</i> sp.       | Not mentioned              | Red Sea, Egypt, Africa | [10] |
| 50 | 7 $\beta$ ,15 $\alpha$ ,24-Trihydroxyolean-12-ene-3,11,22-trione           | Triterpene               | <i>Scopulariopsis</i> sp.             | <i>Stylophora</i> sp.       | Not mentioned              | Red Sea, Egypt, Africa | [10] |

|    |                                                      |                      |                           |                       |                                                       |                        |            |
|----|------------------------------------------------------|----------------------|---------------------------|-----------------------|-------------------------------------------------------|------------------------|------------|
| 51 | 15 $\alpha$ ,24-Dihydroxyolean-12-ene-3,11,22-trione | Triterpene           | <i>Scopulariopsis</i> sp. | <i>Stylophora</i> sp. | Not mentioned                                         | Red Sea, Egypt, Africa | [10]       |
| 52 | Soyasapogenol B                                      | Triterpene           | <i>Scopulariopsis</i> sp. | <i>Stylophora</i> sp. | Antimutagenic, antiviral and anti-inflammatory        | Red Sea, Egypt, Africa | [10,11]    |
| 53 | (2 <i>E</i> , 4 <i>E</i> )-4'-Dihydrophaseic acid    | Sesquiterpene        | <i>Scopulariopsis</i> sp. | <i>Stylophora</i> sp. | Not mentioned                                         | Red Sea, Egypt, Africa | [10]       |
| 54 | 2 <i>Z</i> , 4 <i>E</i> )-4'-Dihydrophaseic acid     | Sesquiterpene        | <i>Scopulariopsis</i> sp. | <i>Stylophora</i> sp. | Not mentioned                                         | Red Sea, Egypt, Africa | [10]       |
| 55 | 6-Hydroxy-2,7-dimethyl-1,4-naphthoquinone            | Polyketide           | <i>Scopulariopsis</i> sp. | <i>Stylophora</i> sp. | Not mentioned                                         | Red Sea, Egypt, Africa | [10]       |
| 56 | 6-Hydroxy-2,2-dimethyl-2 <i>H</i> -chromene          | Polyketide           | <i>Scopulariopsis</i> sp. | <i>Stylophora</i> sp. | Antioxidant and cancer protecting effects             | Red Sea, Egypt, Africa | [10,12]    |
| 57 | Scoparone                                            | Polyketide           | <i>Scopulariopsis</i> sp. | <i>Stylophora</i> sp. | Immuno-suppressive, antiproliferative and antioxidant | Red Sea, Egypt, Africa | [10,13-15] |
| 58 | 5-Methyluracil                                       | Nitrogenous compound | <i>Scopulariopsis</i> sp. | <i>Stylophora</i> sp. | Antitumor                                             | Red Sea, Egypt, Africa | [10,16]    |

|    |                                       |                         |                           |                       |                |                        |      |
|----|---------------------------------------|-------------------------|---------------------------|-----------------------|----------------|------------------------|------|
| 59 | 4-Hydroxy-3-methoxy-2(1H)-quinolinone | Nitrogenous compound    | <i>Scopulariopsis</i> sp. | <i>Stylophora</i> sp. | Not mentioned  | Red Sea, Egypt, Africa | [10] |
| 60 | 4-Hydroxyphenyl-glyoxylic acid amide  | Nitrogenous compound    | <i>Scopulariopsis</i> sp. | <i>Stylophora</i> sp. | Not mentioned  | Red Sea, Egypt, Africa | [10] |
| 61 | Indole-3-carboxaldehyde               | Nitrogenous compound    | <i>Scopulariopsis</i> sp. | <i>Stylophora</i> sp. | Not mentioned  | Red Sea, Egypt, Africa | [10] |
| 62 | Indole-3-carboxylic acid              | Nitrogenous compound    | <i>Scopulariopsis</i> sp. | <i>Stylophora</i> sp. | Not mentioned  | Red Sea, Egypt, Africa | [10] |
| 63 | (1H-Indol-3-yl)-oxo-acetamide         | Nitrogenous compound    | <i>Scopulariopsis</i> sp. | <i>Stylophora</i> sp. | Not mentioned  | Red Sea, Egypt, Africa | [10] |
| 64 | N-Acetyl- $\beta$ -oxo-tryptamine     | Nitrogenous compound    | <i>Scopulariopsis</i> sp. | <i>Stylophora</i> sp. | Not mentioned  | Red Sea, Egypt, Africa | [10] |
| 65 | Gliomastin A                          | Hydroquinone derivative | <i>Gliomastix</i> sp.     | <i>Stylophora</i> sp. | Cytotoxic      | Red Sea, Egypt, Africa | [17] |
| 66 | Gliomastin B                          | Hydroquinone derivative | <i>Gliomastix</i> sp.     | <i>Stylophora</i> sp. | Not mentioned  | Red Sea, Egypt, Africa | [17] |
| 67 | Gliomastin C                          | Hydroquinone derivative | <i>Gliomastix</i> sp.     | <i>Stylophora</i> sp. | Antitubercular | Red Sea, Egypt, Africa | [17] |
| 68 | Gliomastin D                          | Hydroquinone derivative | <i>Gliomastix</i> sp.     | <i>Stylophora</i> sp. | Not mentioned  | Red Sea, Egypt, Africa | [17] |
| 69 | 9-O-Methyl-gliomastin C               | Hydroquinone derivative | <i>Gliomastix</i> sp.     | <i>Stylophora</i> sp. | Not mentioned  | Red Sea, Egypt, Africa | [17] |



|    |                                                              |                         |                       |                       |                                              |                        |      |
|----|--------------------------------------------------------------|-------------------------|-----------------------|-----------------------|----------------------------------------------|------------------------|------|
| 70 | Acremonin A 1-O- $\beta$ -D-glucopyranoside                  | Hydroquinone derivative | <i>Gliomastix</i> sp. | <i>Stylophora</i> sp. | Not mentioned                                | Red Sea, Egypt, Africa | [17] |
| 71 | Gliomastin E 1-O- $\beta$ -D-glucopyranoside                 | Hydroquinone derivative | <i>Gliomastix</i> sp. | <i>Stylophora</i> sp. | Not mentioned                                | Red Sea, Egypt, Africa | [17] |
| 72 | 6'-O-Acetyl-isohomoarbutin                                   | Hydroquinone derivative | <i>Gliomastix</i> sp. | <i>Stylophora</i> sp. | Not mentioned                                | Red Sea, Egypt, Africa | [17] |
| 73 | Isohomoarbutin                                               | Hydroquinone derivative | <i>Gliomastix</i> sp. | <i>Stylophora</i> sp. | Not mentioned                                | Red Sea, Egypt, Africa | [17] |
| 74 | 2-Methyl-1,4-benzenediol                                     | Hydroquinone derivative | <i>Gliomastix</i> sp. | <i>Stylophora</i> sp. | Cytotoxic<br>Antitubercular<br>Antibacterial | Red Sea, Egypt, Africa | [17] |
| 75 | Acremonin A                                                  | Hydroquinone derivative | <i>Gliomastix</i> sp. | <i>Stylophora</i> sp. | Cytotoxic<br>Antitubercular                  | Red Sea, Egypt, Africa | [17] |
| 76 | Prenylhydroquinone                                           | Hydroquinone derivative | <i>Gliomastix</i> sp. | <i>Stylophora</i> sp. | Cytotoxic<br>Antitubercular<br>Antibacterial | Red Sea, Egypt, Africa | [17] |
| 77 | F-11334A <sub>1</sub>                                        | Hydroquinone derivative | <i>Gliomastix</i> sp. | <i>Stylophora</i> sp. | Cytotoxic<br>Antitubercular                  | Red Sea, Egypt, Africa | [17] |
| 78 | (R)-2-(2-Hydroxypropan-2-yl)-2,3-dihydro-5-hydroxybenzofuran | Hydroquinone derivative | <i>Gliomastix</i> sp. | <i>Stylophora</i> sp. | Not mentioned                                | Red Sea, Egypt, Africa | [17] |
| 79 | 2,2-Dimethylchroman-3,6-diol                                 | Hydroquinone derivative | <i>Gliomastix</i> sp. | <i>Stylophora</i> sp. | Not mentioned                                | Red Sea, Egypt, Africa | [17] |

|    |                        |                          |                                 |                        |                                 |                              |         |
|----|------------------------|--------------------------|---------------------------------|------------------------|---------------------------------|------------------------------|---------|
| 80 | Verruculosin A         | Oligophen-alenone dimer  | <i>Talaromyces verruculosus</i> | <i>Goniopora</i> sp.   | Antitumor                       | South China Sea, China, Asia | [18]    |
| 81 | Verruculosin B         | Oligophen-alenone dimer  | <i>Talaromyces verruculosus</i> | <i>Goniopora</i> sp.   | Antitumor                       | South China Sea, China, Asia | [18]    |
| 82 | Bacillisporin F        | Oligophen-alenone dimer  | <i>Talaromyces verruculosus</i> | <i>Goniopora</i> sp.   | Antitumor                       | South China Sea, China, Asia | [18]    |
| 83 | Duclauxin              | Oligophen-alenone dimer  | <i>Talaromyces verruculosus</i> | <i>Goniopora</i> sp.   | Antitumor and antileukemia      | South China Sea, China, Asia | [18]    |
| 84 | Xenoclauxin            | Oligophen-alenone dimers | <i>Talaromyces verruculosus</i> | <i>Goniopora</i> sp.   | Antitumor                       | South China Sea, China, Asia | [18]    |
| 85 | Erythroanthin sulfate  | Carotenoid               | <i>Erythrobacter flavus</i>     | <i>Acropora nasuta</i> | Not mentioned                   | Indonesia                    | [19]    |
| 86 | Ketonostoxanthin       | Carotenoid               | <i>Erythrobacter flavus</i>     | <i>Acropora nasuta</i> | Not mentioned                   | Indonesia                    | [19]    |
| 87 | Nostoxanthin sulfate   | Carotenoid               | <i>Erythrobacter flavus</i>     | <i>Acropora nasuta</i> | Not mentioned                   | Indonesia                    | [19]    |
| 88 | Caloxanthin sulfate    | Carotenoid               | <i>Erythrobacter flavus</i>     | <i>Acropora nasuta</i> | Not mentioned                   | Indonesia                    | [19]    |
| 89 | Nostoxanthin           | Carotenoid               | <i>Erythrobacter flavus</i>     | <i>Acropora nasuta</i> | Not mentioned                   | Indonesia                    | [19]    |
| 90 | Zeaxanthin sulfate     | Carotenoid               | <i>Erythrobacter flavus</i>     | <i>Acropora nasuta</i> | Not mentioned                   | Indonesia                    | [19]    |
| 91 | Caloxanthin            | Carotenoid               | <i>Erythrobacter flavus</i>     | <i>Acropora nasuta</i> | Not mentioned                   | Indonesia                    | [19]    |
| 92 | Bacterio-rubixanthinal | Carotenoid               | <i>Erythrobacter flavus</i>     | <i>Acropora nasuta</i> | Not mentioned                   | Indonesia                    | [19]    |
| 93 | Zeaxanthin             | Carotenoid               | <i>Erythrobacter flavus</i>     | <i>Acropora nasuta</i> | Radioprotectant and antioxidant | Indonesia                    | [19-21] |

|     |                         |                          |                             |                        |                                                                               |           |         |
|-----|-------------------------|--------------------------|-----------------------------|------------------------|-------------------------------------------------------------------------------|-----------|---------|
| 94  | $\beta$ -Cryptoxanthin  | Carotenoid               | <i>Erythrobacter flavus</i> | <i>Acropora nasuta</i> | Antioxidant, anti-inflammatory, anticancer, homeostatic and anti-osteoporosis | Indonesia | [19,22] |
| 95  | Bacteriochlorophyll     | Carotenoid               | <i>Erythrobacter flavus</i> | <i>Acropora nasuta</i> | Not mentioned                                                                 | Indonesia | [19]    |
| 96  | $\beta$ -Carotene       | Carotenoid               | <i>Erythrobacter flavus</i> | <i>Acropora nasuta</i> | Antioxidant and anticancer                                                    | Indonesia | [19,23] |
| 97  | Aranciamycin K          | Anthracycline analogue   | <i>Streptomyces</i> sp.     | <i>Porites</i> sp.     | Not mentioned                                                                 | China     | [24]    |
| 98  | Isotirandamycin B       | Tirandamycin analogue    | <i>Streptomyces</i> sp.     | <i>Porites</i> sp.     | Bacteriostatic                                                                | China     | [24]    |
| 99  | $\gamma$ -Rhodomycinone | Anthracycline derivative | <i>Streptomyces</i> sp.     | <i>Porites</i> sp.     | Not mentioned                                                                 | China     | [24]    |
| 100 | $\beta$ -Rhodomycinone  | Anthracycline derivative | <i>Streptomyces</i> sp.     | <i>Porites</i> sp.     | Cytotoxic                                                                     | China     | [24]    |
| 101 | 262-6                   | Anthracycline derivative | <i>Streptomyces</i> sp.     | <i>Porites</i> sp.     | Antibacterial<br>Cytotoxic                                                    | China     | [24]    |
| 102 | $\beta$ -Rhodomycin-II  | Anthracycline derivative | <i>Streptomyces</i> sp.     | <i>Porites</i> sp.     | Antibacterial<br>Cytotoxic                                                    | China     | [24]    |
| 103 | Tirandamycin A          | Tirandamycin derivative  | <i>Streptomyces</i> sp.     | <i>Porites</i> sp.     | Antibacterial                                                                 | China     | [24]    |

|     |                                         |                                   |                                    |                                                |               |                            |      |
|-----|-----------------------------------------|-----------------------------------|------------------------------------|------------------------------------------------|---------------|----------------------------|------|
| 104 | Tirandamycin B                          | Tirandamycin derivative           | <i>Streptomyces</i> sp.            | <i>Porites</i> sp.                             | Antibacterial | China                      | [24] |
| 105 | Pelopuradazole                          | Imidazole alkaloid                | <i>Pelomonas puraquae</i>          | <i>Acropora</i> sp.                            | Not mentioned | South China Sea            | [25] |
| 106 | 3H-Imidazole-4-carboxylic acid          | Imidazole alkaloid                | <i>Pelomonas puraquae</i>          | <i>Acropora</i> sp.                            | Not mentioned | South China Sea            | [25] |
| 107 | 2-Methyl-3H-imidazole-4-carboxylic acid | Imidazole alkaloid                | <i>Pelomonas puraquae</i>          | <i>Acropora</i> sp.                            | Not mentioned | South China Sea            | [25] |
| 108 | 1H-Pyrrole-2-carboxylic acid            | Imidazole alkaloid                | <i>Pelomonas puraquae</i>          | <i>Acropora</i> sp.                            | Antibacterial | South China Sea            | [25] |
| 109 | Pelopurin A                             | Cyclodipeptide                    | <i>Pelomonas puraquae</i>          | <i>Acropora</i> sp.                            | Not mentioned | South China Sea            | [25] |
| 110 | Pelopurin B                             | Cyclodipeptide                    | <i>Pelomonas puraquae</i>          | <i>Acropora</i> sp.                            | Not mentioned | South China Sea            | [25] |
| 111 | Unnamed                                 | Hydroxy-quinaldic acid derivative | <i>Streptomyces cyaneofuscatus</i> | Different corals belong to <i>Scleractinia</i> | Cytotoxic     | Northeast Atlantic, Europe | [26] |
| 112 | Unnamed                                 | Hydroxy-quinaldic acid derivative | <i>Streptomyces cyaneofuscatus</i> | Different corals belong to <i>Scleractinia</i> | Not mentioned | Northeast Atlantic, Europe | [26] |
| 113 | Unnamed                                 | Hydroxy-quinaldic acid derivative | <i>Streptomyces cyaneofuscatus</i> | Different corals belong to <i>Scleractinia</i> | Not mentioned | Northeast Atlantic, Europe | [26] |
| 114 | 3-Hydroxyquinaldic acid                 | Hydroxyquinaldic acid derivative  | <i>Streptomyces cyaneofuscatus</i> | Different corals belong to <i>Scleractinia</i> | Not mentioned | Northeast Atlantic, Europe | [26] |

|     |                                       |                                  |                                    |                                                |                          |                            |         |
|-----|---------------------------------------|----------------------------------|------------------------------------|------------------------------------------------|--------------------------|----------------------------|---------|
| 115 | 3- Hydroxyquinaldic acid amide        | Hydroxyquinaldic acid derivative | <i>Streptomyces cyaneofuscatus</i> | Different corals belong to <i>Scleractinia</i> | Cytotoxic                | Northeast Atlantic, Europe | [26]    |
| 116 | Nakienone A                           | Cyclic C-11                      | <i>Synechocystis</i> sp.           | <i>Acropora</i> sp.                            | Cytotoxic                | Okinawa, Japan, Asia       | [27]    |
| 117 | Nakitriol                             | Cyclic C-11                      | <i>Synechocystis</i> sp.           | <i>Acropora</i> sp.                            | Cytotoxic                | Okinawa, Japan, Asia       | [27]    |
| 118 | Nakienone B                           | Cyclic C-11                      | <i>Synechocystis</i> sp.           | <i>Acropora</i> sp.                            | Not mentioned            | Okinawa, Japan, Asia       | [27]    |
| 119 | Nakienone C                           | Cyclic C-11                      | <i>Synechocystis</i> sp.           | <i>Acropora</i> sp.                            | Not mentioned            | Okinawa, Japan, Asia       | [27]    |
| 120 | Pitiamide A                           | Fatty acid amide                 | <i>Phormidium corallyticum</i>     | <i>Porites</i> sp.                             | Anti-proliferative       | USA, North America         | [28]    |
| 121 | 1E-Pitiamide B                        | Fatty acid amide                 | <i>Phormidium corallyticum</i>     | <i>Porites</i> sp.                             | Anti-proliferative       | USA, North America         | [28]    |
| 122 | Lookeyolide A                         | Macrolide                        | <i>Roseofilum reptotaenium</i>     | <i>Montastraea</i> sp.                         | Not mentioned            | Florida, North America     | [29]    |
| 123 | Lookeyolide B                         | Macrolide                        | <i>Roseofilum reptotaenium</i>     | <i>Montastraea</i> sp.                         | Not mentioned            | Florida, North America     | [29]    |
| 124 | Alteramide A                          | Tetracyclic alkaloid             | <i>Pseudoalteromonas</i> sp.       | <i>Montipora</i> sp.                           | Cytotoxic and antifungal | Japan, Asia                | [30,31] |
| 125 | Alteramide B                          | Tetracyclic alkaloid             | <i>Pseudoalteromonas</i> sp.       | <i>Montipora</i> sp.                           | Antifungal               | Japan, Asia                | [30,31] |
| 126 | (2Z,4E)-3-Methyl-2,4-decadienoic acid | Fatty acid                       | <i>Microbulbifer</i> sp.           | <i>Porites</i> sp.                             | Antibacterial            | Japan, Asia                | [32]    |

|     |                                                         |                |                          |                         |                            |                                  |      |
|-----|---------------------------------------------------------|----------------|--------------------------|-------------------------|----------------------------|----------------------------------|------|
| 127 | Nesteretal A                                            | Polyhemiketal, | <i>Nesterenkonia</i> sp. | <i>Platygyra</i> sp.    | RXR $\alpha$ activity      | China Asia                       | [33] |
| 128 | Lobophorin K                                            | Lobophorin     | <i>Streptomyces</i> sp.  | <i>Lophelia pertusa</i> | Cytotoxic<br>Antibacterial | Cantabrian Sea,<br>North America | [34] |
| 129 | Gorgosterol                                             | Sterol         | <i>Zooxanthellae</i>     | <i>Oculina diffusa</i>  | Not mentioned              | Permuda, Europe                  | [35] |
| 130 | 23-Desmethyl-gorgosterol                                | Sterol         | <i>Zooxanthellae</i>     | <i>Oculina diffusa</i>  | Not mentioned              | Permuda, Europe                  | [35] |
| 131 | Dinosterol                                              | Sterol         | <i>Zooxanthellae</i>     | <i>Oculina diffusa</i>  | Not mentioned              | Permuda, Europe                  | [35] |
| 132 | Cholesterol                                             | Sterol         | <i>Zooxanthellae</i>     | <i>Oculina diffusa</i>  | Not mentioned              | Permuda, Europe                  | [35] |
| 133 | 4 $\alpha$ -(24S)-Dimethyl-cholesta-3 $\beta$ -ol       | Sterol         | <i>Zooxanthellae</i>     | <i>Oculina diffusa</i>  | Not mentioned              | Permuda, Europe                  | [35] |
| 134 | 4 $\alpha$ -(24R)-Dimethyl-cholesta-22-en-3 $\beta$ -ol | Sterol         | <i>Zooxanthellae</i>     | <i>Oculina diffusa</i>  | Not mentioned              | Permuda, Europe                  | [35] |

**Table S2:** Docking energies (kcal/mol) of investigated compounds with different SARS-CoV-2 targets

| Compound Number | 6LU7                            | 6W4H, nsp16        | 7BV2, nsp12                  | 6VW1       | 6M0J                                       |
|-----------------|---------------------------------|--------------------|------------------------------|------------|--------------------------------------------|
|                 | Main protease, M <sup>pro</sup> | Methyl Transferase | RNA-dependent RNA polymerase | Human ACE2 | Receptor-binding domain (RBD) of S-protein |
| 3               | -7.4                            | -7.1               | -6.3                         | -5.6       | -6.1                                       |
| 7               | -6.9                            | -7.9               | -7                           | -6.4       | -6.4                                       |
| 17              | -6.6                            | -7.6               | -6.2                         | -5.8       | -6.4                                       |
| 18              | -7.7                            | -8.2               | -6.3                         | -7         | -6.7                                       |
| 31              | -7.1                            | -7.3               | -6.3                         | -5.2       | -5.6                                       |
| 32              | -7.4                            | -7.2               | -6.3                         | -5.9       | -5.9                                       |
| 39              | -7.9                            | -8.0               | -6.3                         | -5.8       | -6.7                                       |
| 53              | -6.1                            | -6.3               | -5.9                         | -6.1       | -5.9                                       |
| 77              | -5.8                            | -6.5               | -5.4                         | -5.3       | -5.6                                       |
| 98              | -7.8                            | -8.4               | -7.6                         | -5.9       | -6.8                                       |
| 103             | -7.9                            | -8.5               | -8.1                         | -6.3       | -6.8                                       |
| 104             | -7.8                            | -8.3               | -7.9                         | -5.9       | -6.8                                       |
| 120             | -5.8                            | -5.8               | -5                           | -5         | -5.1                                       |
| 121             | -5.2                            | -6.3               | -4.8                         | -5.2       | -4.8                                       |
| 124             | -7.1                            | -8.2               | -9                           | -6.1       | -7.4                                       |
| <b>Ligand</b>   | -7.9 (N3)                       | -8.1 (SAM)         | -7.0 (RemdesivirTP)          | ----       | ---                                        |

## References

1. Elnaggar, M.S.; Ebada, S.S.; Ashour, M.L.; Ebrahim, W.; Müller, W.E.; Mándi, A.; Kurtán, T.; Singab, A.; Lin, W.; Liu, Z. Xanthonenes and sesquiterpene derivatives from a marine-derived fungus *Scopulariopsis* sp. *Tetrahedron* **2016**, *72*, 2411-2419.
2. Fujimoto, H.; Asai, T.; Kim, Y.-P.; Ishibashi, M. Nine Constituents Including Six Xanthone-Related Compounds Isolated from Two Ascomycetes, *Gelasinospora santi-florii* and *Emericella quadrilineata*, Found in a Screening Study Focused on Immunomodulatory Activity. *Chem. Pharm. Bull.* **2006**, *54*, 550-553.
3. Liu, H.; Chen, S.; Liu, W.; Liu, Y.; Huang, X.; She, Z. Polyketides with Immunosuppressive Activities from Mangrove Endophytic Fungus *Penicillium* sp. ZJ-SY2. *Mar. Drugs* **2016**, *14*, 217.
4. Liu, S.; Wang, H.; Su, M.; Hwang, G.J.; Hong, J.; Jung, J.H. New metabolites from the sponge-derived fungus *Aspergillus sydowii* J05B-7F-4. *Nat. Prod. Res.* **2017**, *31*, 1682-1686.
5. Dalinova, A.; Chisty, L.; Kochura, D.; Garnyuk, V.; Petrova, M.; Prokofieva, D.; Yurchenko, A.; Dubovik, V.; Ivanov, A.; Smirnov, S. Isolation and Bioactivity of Secondary Metabolites from Solid Culture of the Fungus, *Alternaria sonchi*. *Biomolecules* **2020**, *10*, 81.
6. Bunbamrung, N.; Intaraudom, C.; Supothina, S.; Komwijit, S.; Pittayakhajonwut, P. Antibacterial and anti-phytopathogenic substances from the insect pathogenic fungus *Gibellula* sp. BCC36964. *Phytochem. Lett.* **2015**, *12*, 142-147.
7. Kramer, A.; Beck, H.C.; Kumar, A.; Kristensen, L.P.; Imhoff, J.F.; Labes, A. Proteomic Analysis of Anti-Cancerous Scopularide Production by a Marine *Microascus brevicaulis* Strain and Its UV Mutant. *PloS one* **2015**, *10*.
8. Zhang, H.; Mao, L.-L.; Qian, P.-T.; Shan, W.-G.; Wang, J.-D.; Bai, H. Two new metabolites from a soil fungus *Curvularia affinis* strain HS-FG-196. *J. Asian. Nat. Prod. Res.* **2012**, *14*, 1078-1083.
9. Wang, W.; Liao, Y.; Tang, C.; Huang, X.; Luo, Z.; Chen, J.; Cai, P. Cytotoxic and Antibacterial Compounds from the Coral-Derived Fungus *Aspergillus tritici* SP2-8-1. *Mar. drugs* **2017**, *15*, 348.
10. Elnaggar, M.S.; Ebada, S.S.; Ashour, M.L.; Ebrahim, W.; Singab, A.; Lin, W.; Liu, Z.; Proksch, P. Two new triterpenoids and a new naphthoquinone derivative isolated from a hard coral-derived fungus *Scopulariopsis* sp. *Fitoterapia* **2017**, *116*, 126-130.
11. Amin, H.; Abo Elsouid, M.; Sahab, A. Whole cell biocatalyst for soyasapogenol b production from soybean saponin. *The Open Conference Proceedings Journal* **2016**, *7*, 134-143.
12. Babu, K.S.; Raju, B.C.; Praveen, B.; Kishore, K.H.; Murty, U.S.; Rao, J.M. Microwave assisted synthesis and antimicrobial activity of 2, 2-dimethyl chromenes. *Heterocycl. Comm.* **2003**, *9*, 519-526.
13. Huei-Chen, H.; Shu-Hsun, C.; Chao, P.-D.L. Vasorelaxants from chinese herbs, emodin and scoparone, possess immunosuppressive properties. *Eur. J. Pharmacol.* **1991**, *198*, 211-213.
14. Park, S.; Kim, J.-K.; Oh, C.J.; Choi, S.H.; Jeon, J.-H.; Lee, I.-K. Scoparone interferes with STAT3-induced proliferation of vascular smooth muscle cells. *Exp. Mol. Med.* **2015**, *47*, e145-e145.
15. Atmaca, M.; Bilgin, H.M.; Obay, B.D.; Diken, H.; Kelle, M.; Kale, E. The hepatoprotective effect of coumarin and coumarin derivatives on carbon tetrachloride-induced hepatic injury by antioxidative activities in rats. *J. Physiol. Biochem.* **2011**, *67*, 569.



16. Welchinska, E. Anti-tumor activity of bacterial lectin and 5-methyluracil adduct. *CBU International Conference Proceedings* **2014**, *2*, 307.
17. Elnaggar, M.S.; Ebrahim, W.; Mándi, A.; Kurtán, T.; Müller, W.E.; Kalscheuer, R.; Singab, A.; Lin, W.; Liu, Z.; Proksch, P. Hydroquinone derivatives from the marine-derived fungus *Gliomastix* sp. *RSC Adv.* **2017**, *7*, 30640-30649.
18. Wang, M.; Yang, L.; Feng, L.; Hu, F.; Zhang, F.; Ren, J.; Qiu, Y.; Wang, Z. Verruculosins A–B, New Oligophenalenone Dimers from the Soft Coral-Derived Fungus *Talaromyces verruculosus*. *Mar. drugs* **2019**, *17*, 516.
19. Setiyono, E.; Pringgenies, D.; Shioi, Y.; Kanesaki, Y.; Awai, K.; Brotosudarmo, T.H.P. Sulfur-Containing Carotenoids from A Marine Coral Symbiont *Erythrobacter flavus* Strain KJ5. *Mar. drugs* **2019**, *17*, 349.
20. Santocono, M.; Zurria, M.; Berrettini, M.; Fedeli, D.; Falcioni, G. Influence of astaxanthin, zeaxanthin and lutein on DNA damage and repair in UVA-irradiated cells. *J. Photochem. Photobiol. B, Biol.* **2006**, *85*, 205-215.
21. Havaux, M.; Dall'Osto, L.; Bassi, R. Zeaxanthin Has Enhanced Antioxidant Capacity with Respect to All Other Xanthophylls in Arabidopsis Leaves and Functions Independent of Binding to PSII Antennae. *Plant Physiol.* **2007**, *145*, 1506-1520.
22. Burri, B.J.; La Frano, M.R.; Zhu, C. Absorption, metabolism, and functions of  $\beta$ -cryptoxanthin. *Nutr. Rev.* **2016**, *74*, 69-82.
23. Bogacz-Radomska, L.; Harasym, J. B-carotene—properties and production methods. *Food Quality and Safety* **2018**, *2*.
24. Cong, Z.; Huang, X.; Liu, Y.; Liu, Y.; Wang, P.; Liao, S.; Yang, B.; Zhou, X.; Huang, D.; Wang, J. Cytotoxic anthracycline and antibacterial tirandamycin analogues from a marine-derived *Streptomyces* sp. SCSIO 41399. *J. Antibiot.* **2019**, *72*, 45-49.
25. He, X.-X.; Chen, X.-J.; Peng, G.-T.; Guan, S.-Y.; Lei, L.-F.; Yao, J.-H.; Liu, B.-X.; Zhang, C.-X. Pelopuradazole, a new imidazole derivative alkaloid from the marine bacteria *Pelomonas puraquae* sp. nov.. *Nat. Prod. Res.* **2014**, *28*, 680-682.
26. Ortiz-López, F.J.; Alcalde, E.; Sarmiento-Vizcaíno, A.; Díaz, C.; Cautain, B.; García, L.A.; Blanco, G.; Reyes, F. New 3-Hydroxyquinaldic Acid Derivatives from Cultures of the Marine Derived Actinomycete *Streptomyces cyaneofuscatus* M-157. *Mar. drugs* **2018**, *16*, 371.
27. Nagle, D.G.; Gerwick, W.H. Nakienones A-C and nakitriol, new cytotoxic cyclic C<sub>11</sub> metabolites from an okinawan cyanobacterial (*Synechocystis* sp.) overgrowth of coral. *Tetrahedron Lett.* **1995**, *36*, 849-852.
28. Cai, W.; Matthews, J.H.; Paul, V.J.; Luesch, H. Pitiamides a and b, multifunctional fatty acid amides from marine cyanobacteria. *Planta Med.* **2016**, *82*, 897-902.
29. Gunasekera, S.P.; Meyer, J.L.; Ding, Y.; Abboud, K.A.; Luo, D.; Campbell, J.E.; Angerhofer, A.; Goodsell, J.L.; Raymundo, L.J.; Liu, J. Chemical and Metagenomic Studies of the Lethal Black Band Disease of Corals Reveal Two Broadly Distributed, Redox-Sensitive Mixed Polyketide/Peptide Macrocycles. *J. Nat. Prod.* **2019**, *82*, 111-121.
30. Shigemori, H.; Bae, M.A.; Yazawa, K.; Sasaki, T.; Kobayashi, J. AAlteramide A, a new tetracyclic alkaloid from a bacterium *Alteromonas* sp. associated with the marine sponge *Halichondria okadai*. *J. Org. Chem.* **1992**, *57*, 4317-4320.
31. Moree, W.J.; McConnell, O.J.; Nguyen, D.D.; Sanchez, L.M.; Yang, Y.-L.; Zhao, X.; Liu, W.-T.; Boudreau, P.D.; Srinivasan, J.; Atencio, L., *et al.* Microbiota of healthy corals are active against fungi in a light-dependent manner. *ACS Chem. Biol.* **2014**, *9*, 2300-2308.

32. Sharma, A.R.; Harunari, E.; Zhou, T.; Trianto, A.; Igarashi, Y. I Isolation and biosynthesis of an unsaturated fatty acid with unusual methylation pattern from a coral-associated bacterium *Microbulbifer* sp. *Beilstein J. Org. Chem.* **2019**, *15*, 2327-2332.
33. Xie, C.-L.; Chen, R.; Yang, S.; Xia, J.-M.; Zhang, G.-Y.; Chen, C.-H.; Zhang, Y.; Yang, X.-W. Nesteretal A, A Novel Class of Cage-Like Polyketide from Marine-Derived Actinomycete *Nesterenkononia halobia*. *Org. Lett.* **2019**, *21*, 8174-8177.
34. Braña, A.F.; Sarmiento-Vizcaíno, A.; Osset, M.; Pérez-Victoria, I.; Martín, J.; De Pedro, N.; De la Cruz, M.; Díaz, C.; Vicente, F.; Reyes, F. Lobophorin K, a New Natural Product with Cytotoxic Activity Produced by *Streptomyces* sp. M-207 Associated with the Deep-Sea Coral *Lophelia pertusa*. *Mar. drugs* **2017**, *15*, 144.
35. Withers, N.W.; Kokke, W.; Fenical, W.; Djerassi, C. Sterol patterns of cultured zooxanthellae isolated from marine invertebrates: Synthesis of gorgosterol and 23-desmethylgorgosterol by aposymbiotic algae. *Proc. Natl. Acad. Sci. U.S.A.* **1982**, *79*, 3764-3768.
